# Supplementary material for: A Systematic Ex-Vivo Study of the Anti-Proliferative/Cytotoxic Bioactivity of Major Olive Secoiridoids’ Double Combinations and of Total Olive Oil Phenolic Extracts on Multiple Cell-Culture Based Cancer Models Highlights Synergistic Effects
Source: MDPI journal article supplement (doi:10.3390/nu15112538), 2023-05-29
Supplement: s1 [file s1]

**Supplementary material for:**

**A systematic ex-vivo study of the anti-proliferative / cytotoxic bioactivity of Major Olive Secoiridoids' Double Combinations and of Total Olive Oil Phenolic Extracts on multiple cell-culture based cancer models highlights Synergistic Effects**

**Aikaterini Papakonstantinou<sup>†1,2</sup>, Petrina Koumarianou<sup>†1</sup>, Panagiotis Diamantakos<sup>2</sup>, Eleni Melliou<sup>2,3</sup>, Prokopios Magiatis<sup>2\*</sup>, Haralabia Boleti<sup>1\*</sup>**

<sup>1</sup> Intracellular Parasitism Laboratory, Microbiology Department, Hellenic Pasteur Institute, 115 21, Athens, Greece

<sup>2</sup> Laboratory of Pharmacognosy and Natural Products Chemistry, Department of Pharmacy, National and Kapodistrian University of Athens, Panepistimioupolis Zografou, 15771 Athens, Greece

<sup>3</sup> World Olive Center for Health, Imittou 76, 11634 Athens, Greece

**Table of contents**

**Figure S1.** Synergistic action of the best effective OOPs' double combinations [A) oleacein with oleuropein aglycone; B) oleacein with oleomissional and C) oleacein with ligstroside aglycone] on the best responded to treatment human cancer cell lines.

**Figure S2.** Synergistic action of OOPs' double combinations on the best responded to treatment AGS, Panc-1 and H1299 human cancer cells.

**Table S1.** Chemical structures of OOPs used in this study

**Table S2.** List of the cancer and non-cancer cell lines used in the study

**Table S3.** Total Phenolic Extracts (TPEs) from olive oil. OOPs' compositions in the extracts used in this study

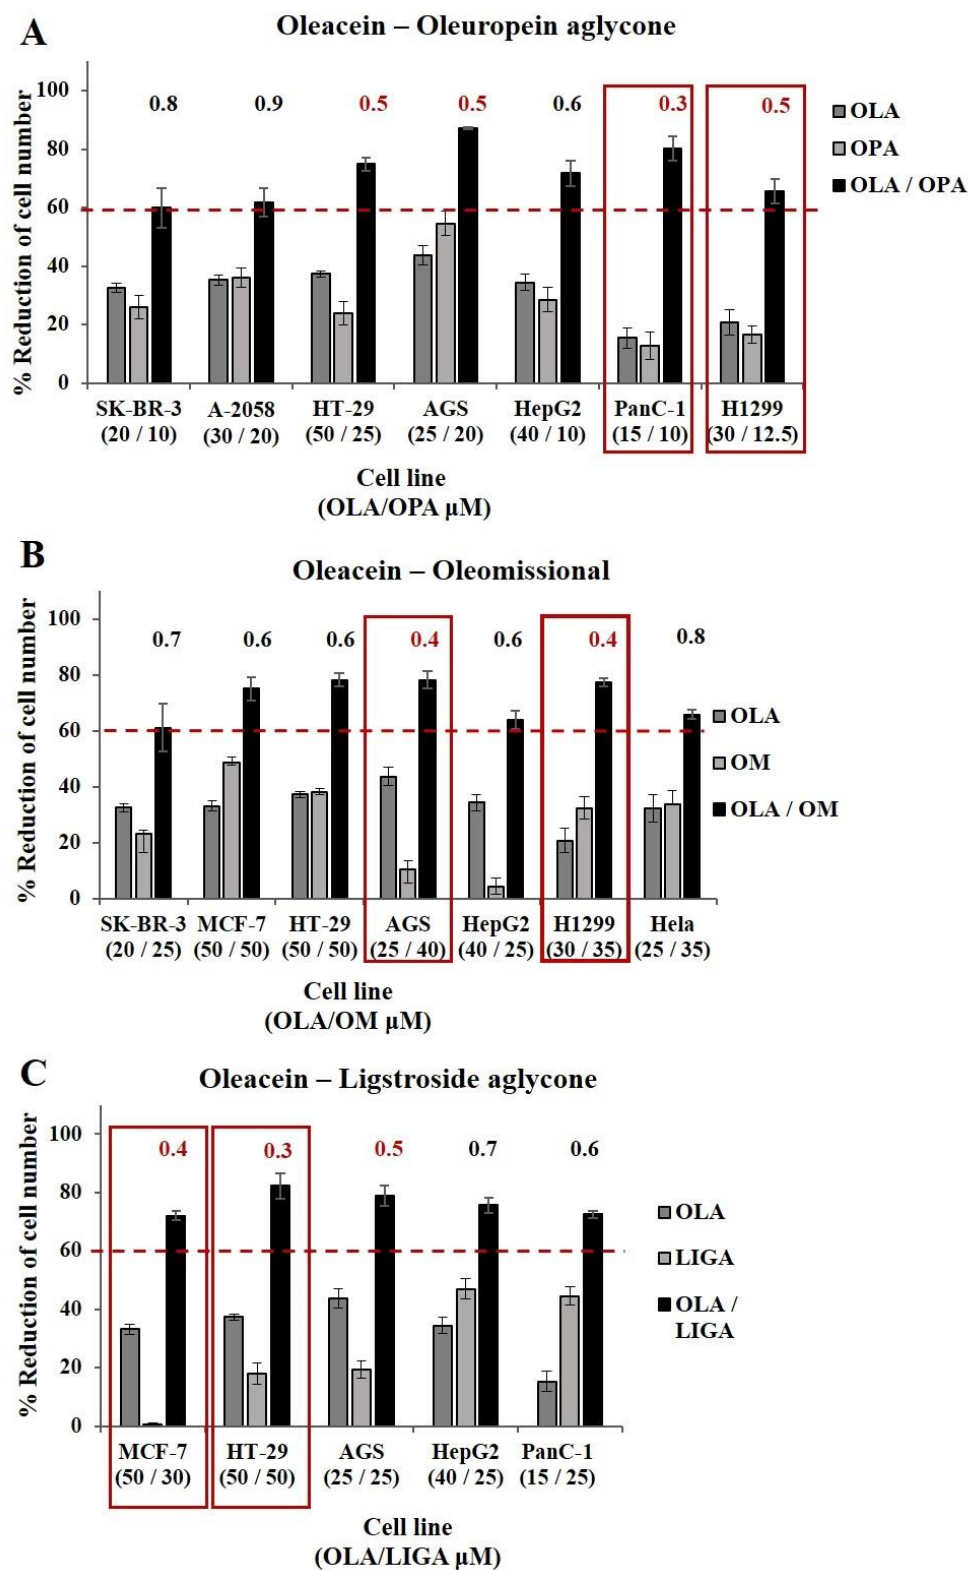

**Figure S1. Synergistic action of the best effective OOPs' double combinations [A) oleacein with oleuropein aglycone; B) oleacein with oleomissional and C) oleacein with ligstroside aglycone] on the best responded to treatment human cancer cell lines.**

The viability of the SK-BR-3, MCF-7, A-2058, HT-29, AGS, HEPG-2, Panc-1 and H1299 human cancer cells was evaluated using the MTT assay after 72 h treatment with double combinations at concentrations  $\frac{1}{2}$  EC<sub>50</sub> value of each for the tested cell line. The effectiveness in reducing cell numbers of each single compound used in the combination at the  $\frac{1}{2}$  EC<sub>50</sub> value was evaluated in parallel and plotted next to the double combination results from two independent experiments performed in triplicates. Only the results of treatments that resulted to 60% reduction of cell numbers in the double combinations are presented. Data are mean cell counts  $\pm$  SE in each treatment group normalized to the control group (cells treated only with 0.2% (v/v) DMSO). CDI values for each combination were calculated and presented on top of each bar.

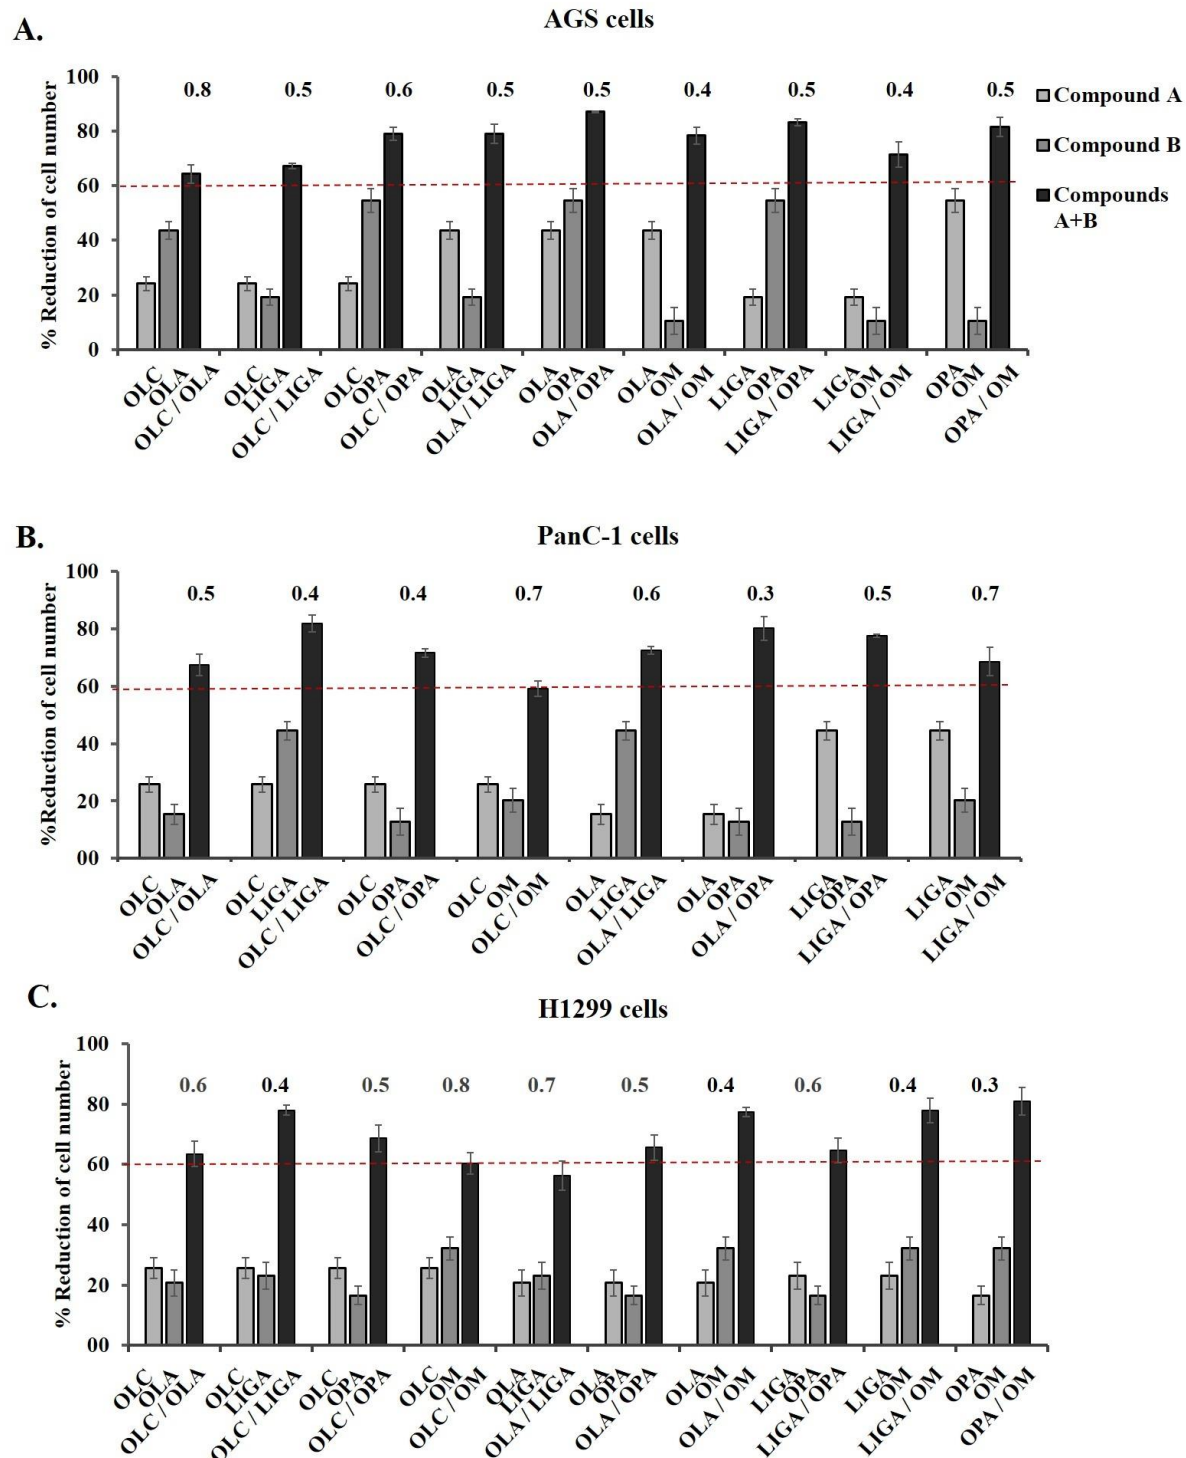

**Figure S2. Synergistic action of OOPs' double combinations on the best responded to treatment AGS, Panc-1 and H1299 human cancer cells.** The viability of the AGS (A), Panc-1 (B) and H1299 (C) human cancer cells was evaluated using the MTT assay after 72

h treatment with 8-10 different double combinations of five different OOPs at concentrations  $\frac{1}{2}$  EC<sub>50</sub> value of each for the tested cell line. The effectiveness in reducing cell numbers of each single compound used in the combination at the  $\frac{1}{2}$  EC<sub>50</sub> value was evaluated in parallel and plotted next to the double combination results from two independent experiments performed in triplicates. Data are mean cell counts  $\pm$  SE in each treatment group normalized to the control group (cells treated only with 0.2% (v/v) DMSO). CDI values for each combination were calculated and presented on top of each bar.

**Table S1.** Chemical structures of OOPs used in this study

| Name                      | Abbreviation | Molecular Structure                                                                  |
|---------------------------|--------------|--------------------------------------------------------------------------------------|
| Oleocanthal (p-HPEA-EDA)  | OLC          | 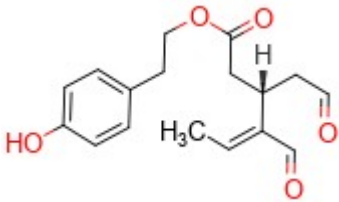   |
| Oleacein (3,4, DHPEA-EDA) | OLA          |    |
| Oleomissional             | OM           |   |
| Oleokoronal               | OLK          |  |

|                                                            |             |                                                                                    |
|------------------------------------------------------------|-------------|------------------------------------------------------------------------------------|
| <p>Oleuropein aglycone-closed<br/>type (3,4, DHPEA-EA)</p> | <p>OPA</p>  | 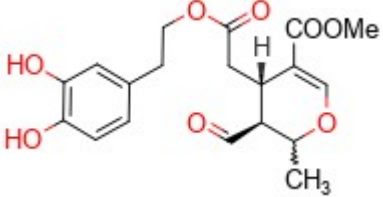 |
| <p>Ligstroside aglycone-closed<br/>type (p-HPEA-EA)</p>    | <p>LIGA</p> |  |
| <p>Tyrosol</p>                                             | <p>TY</p>   |  |

**Table S2.** List of the cancer and non-cancer cell lines used in the study

| <b>CELL LINE<br/>NAME</b>            | <b>CANCER CELL MODEL<br/>(Tissue type tumor origin and characteristics)</b>                                                                                                                                                  | <b>SOURCE</b>                                                                                                                                          |
|--------------------------------------|------------------------------------------------------------------------------------------------------------------------------------------------------------------------------------------------------------------------------|--------------------------------------------------------------------------------------------------------------------------------------------------------|
| <b>COLON</b>                         |                                                                                                                                                                                                                              |                                                                                                                                                        |
| HT-29<br>(ATCC-HTB-38)               | Human colon adenocarcinoma; CD4 negative; cell surface expression of galactose ceramide; The p53 antigen is overproduced, and there is a G → A mutation in codon 273 of the p53 gene resulting in an Arg → His substitution. | Provided by Dr. Sgouras, Hellenic Pasteur Institute, Athens, Greece.                                                                                   |
| <b>STOMACH</b>                       |                                                                                                                                                                                                                              |                                                                                                                                                        |
| AGS<br>(ATCC-CRL-1739)               | Human gastric cancer cell line                                                                                                                                                                                               | Provided by Dr. Sgouras, Hellenic Pasteur Institute, Athens, Greece.                                                                                   |
| <b>LIVER</b>                         |                                                                                                                                                                                                                              |                                                                                                                                                        |
| HepG-2                               | Epithelial like, hepatocellular carcinoma                                                                                                                                                                                    | Provided by Prof. G. Notas, University of Crete, School of Medicine, Heraclion, Crete, Greece.<br>( <a href="mailto:gnotas@uoc.gr">gnotas@uoc.gr</a> ) |
| <b>PANCREAS</b>                      |                                                                                                                                                                                                                              |                                                                                                                                                        |
| PANC-1<br>(ATCC- CRL-1469)           | Pancreatic ductal adenocarcinoma cell line (Epithelioid Carcinoma)                                                                                                                                                           | Provided by Dr I. Papasotiriou, RGCC International GmbH<br>( <a href="mailto:office@rgcc-international.com">office@rgcc-international.com</a> )        |
| <b>BREAST</b>                        |                                                                                                                                                                                                                              |                                                                                                                                                        |
| SK-BR-3<br>(ATCC® HTB-30)            | Mammary gland breast adenocarcinoma; HER2 +ve. : ER-, PR-, HER2+                                                                                                                                                             | Purchased from ATCC                                                                                                                                    |
| MCF-7<br>(ATCC- HTB-22)              | Mammary gland, breast cancer adenocarcinoma: ER+, PR+/-, HER2- (slowly growing epithelial cells)                                                                                                                             | Provided by Dr. Kletsas, Institute of Biosciences and Applications, NCSR Democritus                                                                    |
| MDA-MB-231<br>(ATCC- HTB-26)         | Breast, mammary gland adenocarcinoma epithelial cells. Triple negative (i.e. ER <sup>-</sup> , PR <sup>-</sup> , HER2 <sup>-</sup> )                                                                                         | Provided by Dr. Lymberi, Immunology laboratory, Hellenic Pasteur Institute, Athens, Greece                                                             |
| <b>LUNG</b>                          |                                                                                                                                                                                                                              |                                                                                                                                                        |
| H1299 (NCI H1299)<br>(ATCC CRL-5803) | Non-small Lung cancer; derived from metastatic site: lymph node, p53 deficient                                                                                                                                               | Provided by Prof. E. Kolettas, Biology Lab, University of Ioannina Medical School & IMBB, Ioannina, Greece                                             |
| <b>SKIN</b>                          |                                                                                                                                                                                                                              |                                                                                                                                                        |
| A2058<br>(CRL-11147)                 | Human melanoma; epithelial cells from skin: derived from metastatic site: lymph node                                                                                                                                         | Purchased from ATCC                                                                                                                                    |
| SK-MEL-28                            | Melanocytes; Human Malignant Melanoma                                                                                                                                                                                        | Purchased from ATCC                                                                                                                                    |



|                             |                                                                                                            |                                                                                                                               |
|-----------------------------|------------------------------------------------------------------------------------------------------------|-------------------------------------------------------------------------------------------------------------------------------|
| (HTB-72)                    |                                                                                                            |                                                                                                                               |
| <b>CERVIX</b>               |                                                                                                            |                                                                                                                               |
| Hela<br>(ATCC- CCL-2)       | Human cervix adenocarcinoma with low P53 expression and normal levels of pRB (retinoblastoma suppressor).  | Kind gift from Dr A. Dautry,<br>Laboratory of Biologie des<br>Interactions cellulaires,<br>Institut Pasteur, Paris,<br>France |
| <b>NON CANCER CELLS</b>     |                                                                                                            |                                                                                                                               |
| NHDF<br>(PCS-201-012)       | Normal Adult Human Primary Dermal Fibroblasts isolated from the dermis of juvenile foreskin or adult skin. | Provided by Dr. Sophia Letsiou, APIVITA R&D department, Athens, Greece                                                        |
| HaCaT<br>(CLS - 300493)     | Spontaneously transformed aneuploid immortal keratinocyte cell line from adult human skin                  | Purchased from CLS cell line service                                                                                          |
| MCF 10A<br>(ATCC-CRL-10317) | Epithelial Human mammary gland; breast                                                                     | Purchased from ATCC                                                                                                           |

**Table S3.** Total Phenolic Extracts (TPEs) from olive oil. OPPs' compositions in the extracts used in this study

| <b>Compounds</b>     | <b>Concentration<br/>(mM)</b> | <b>Concentration<br/>(mg/mL)</b> | <b>% of total phenolic content</b> |
|----------------------|-------------------------------|----------------------------------|------------------------------------|
| <b>TPE I</b>         |                               |                                  |                                    |
| Oleocanthal          | 53.6                          | 16.6                             | 44.6                               |
| Oleacein             | 22.6                          | 7.2                              | 19.4                               |
| Ligstroside Aglycone | 8                             | 3                                | 8.1                                |
| Oleuropein Aglycone  | 8                             | 3                                | 8.1                                |
| Oleomissional        | 0                             | 0                                | 0                                  |
| Oleokoronal          | 10.2                          | 3.7                              | 9.9                                |
| Tyrosol              | 27                            | 3.7                              | 9.9                                |
| <b>TPE II</b>        |                               |                                  |                                    |
| Oleocanthal          | 50                            | 15.2                             | 33.9                               |
| Oleacein             | 20.8                          | 6.3                              | 14.1                               |
| Ligstroside Aglycone | 24.5                          | 8.8                              | 19.6                               |
| Oleuropein Aglycone  | 9.6                           | 3.5                              | 7.8                                |
| Oleomissional        | 4.1                           | 1.5                              | 3.3                                |
| Oleokoronal          | 26.6                          | 9.5                              | 21.2                               |
| Tyrosol              | 0                             | 0                                | 0                                  |
| <b>TPE III</b>       |                               |                                  |                                    |
| Oleocanthal          | 0                             | 0                                | 0                                  |
| Oleacein             | 0                             | 0                                | 0                                  |
| Ligstroside Aglycone | 50                            | 18.1                             | 28.5                               |
| Oleuropein Aglycone  | 48                            | 18.2                             | 28.6                               |
| Oleomissional        | 6                             | 2.3                              | 3.6                                |
| Oleokoronal          | 49                            | 17.8                             | 28.0                               |
| Tyrosol              | 52                            | 7.2                              | 11.3                               |
